# Supplementary material for: Co-agglomerated crystals of cyclic nitramines with sterically crowded molecules
Source: Royal Society of Chemistry journal article supplement (doi:10.1039/d2ce00840h), 2022-01-01
Supplement: d2ce00840h1.pdf [file d2ce00840h1.pdf]

## Supplementary Data

### Co-agglomerated crystals of cyclic nitramines with the sterically crowded molecules

#### **S1 Materials**

The chemicals used in the current work, n-butanol, chloroform and dimethyl sulfoxide (DMSO), ethyl acetate, ethyl formate, acetone and n-heptane, are purchased from Lachner. Inc., Neratovice (Czechia) in a pure grade for mixed crystals preparation without further purification. The cis-1,3,4,6-tetranitrooctahydroimidazo-[4,5-d]imidazole or bicyclo-HMX (BCHMX) was prepared at the Institute of Energetic Materials as reported [1, 2]. It was recrystallized using solvent/antisolvent technique by acetone/water, and  $\epsilon$ -2,4,6,8,10,12-hexanitro-2,4,6,8,10,12-hexaazaisowurtzitane ( $\epsilon$ -CL20) was a product of the Explosia Co. Pardubice pilot plant, crystallized using ethyl acetate/n-heptane solvents system; by this way the product was obtained with impact sensitivity of 6.4 J (before precipitation its solution in ethyl acetate treated with a little amount of P<sub>2</sub>O<sub>5</sub> [3]).

#### **S2 Preparation of Coagglomerated Crystals(CACs)**

Basically, two methods have been used to prepare these crystals:

- classical cocrystallization in a solvent/antisolvent system, namely ethyl acetate/n-heptane (sample CCs1) and ethylformate/n-heptane (sample CCs2).
- coagglomeration of the nitramines co-precipitates (from the DMSO/water system) in n-butanol or chloroform - a procedure [4] Similar to the Slurry Method [5].

#### **S2.1 Coagglomeration mechanism prediction of CL20/BCHMX CACs:**

The obtained observations from PXRD, FTIR, Raman spectrums and DTA thermograms found that there will be a conversion of  $\epsilon$ -CL20 to  $\beta$ -CL20 after undergoing interaction with BCHMX during the coagglomeration process. Also shown the predominant N-N stretching vibrations in CL20, equivalently opposite N-N bonding undergone maximum stretching with bending to locate both -NO<sub>2</sub> groups in opposite side sides with Z-order[6,7]. These changes are indicated by taking the 3D structures of both forms of the CL20 molecule in Scheme S1[8-10]. These changes might indicate that CL20 had undergone self-polymorphic modification of the molecule to adjust with BCHMX to form a stable crystal lattice. These stretched N-N bonds showed active intermolecular hydrogen bonds and Van der Waals interactions in CL20 cocrystal earlier reported[4, 6, 8-14]. Based on all these precious observations and other results of earlier reported works, a possible mechanism of co-agglomeration may feasibly be predicted in the sense of proposed the CACs/CCs molecular structure of CL20/BCHMX shown in Scheme S1.

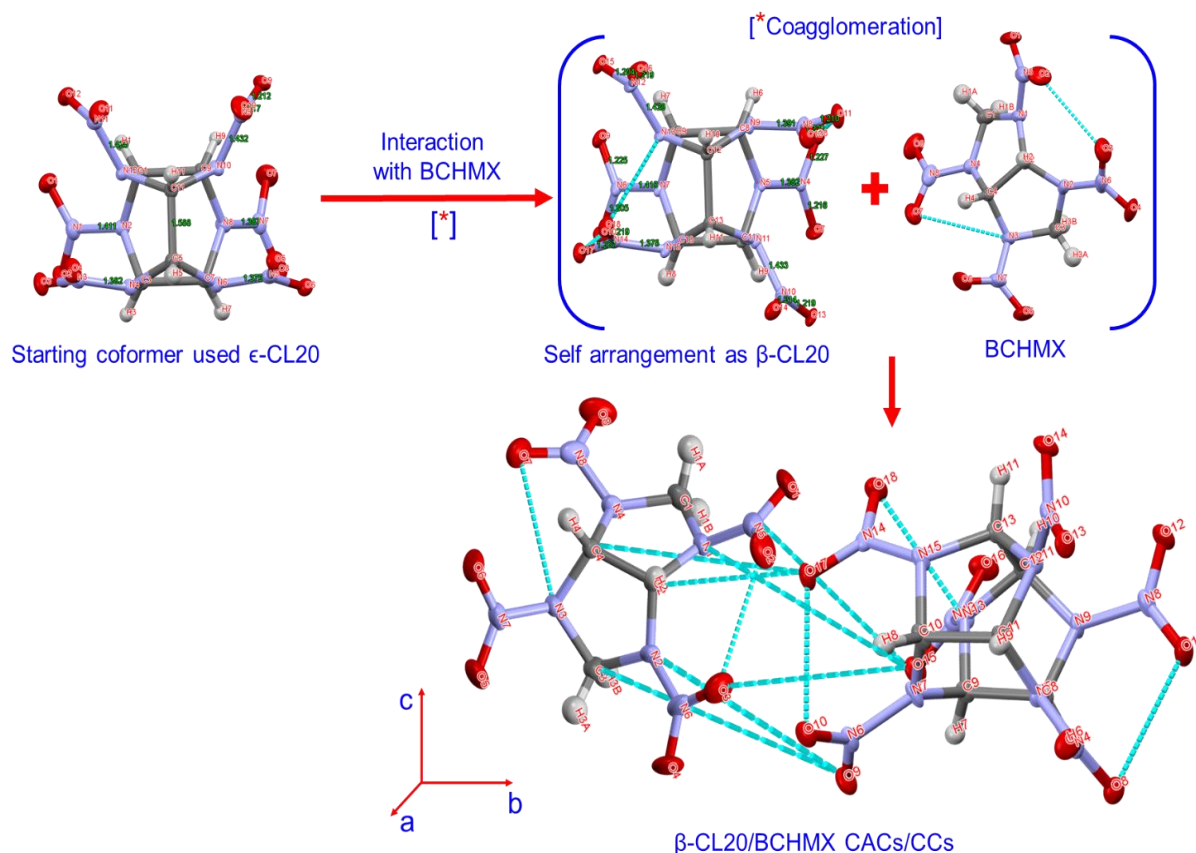

**Scheme S1** Possible mechanism of coagglomeration interaction of both conformers in CACs/CCs

### S3 Characterizations of CACs

#### S3.1 Particle size analysis and crystal density specification

The particle morphology, size distribution, crystal structure and composition analysis of the CACS and the conformers were examined using a MIRA3 LMH scanning electron microscope (Tescan, Czech Republic). Density studies by pycnometer were carried to evaluate the change in density after coagglomeration.

Crystal density was measured using the most reliable technique, Gas pycnometer AccuPyc II 1345; this technique is non-destructive as it uses the gas displacement method to measure volume.

#### S3.2 Chromatographic purity of mixed crystals and hypothetical formulas of CACs

The chromatographic analysis was carried out in Agilent HPLC 1200 Series with a DAD detector. Conditions of measurements, like mobile phase, stationary phase, detector etc., were further modified to improve the separation of EMs [15, 16]. In the present work, determining the purity and composition of co-crystals with concentrations were performed. The isocratic separation mobile phase ratio was used ACN:Water

(60:40) % v/v. The stationary phase was 4.6x250mm BDS Hypersil particle size 5 mm, pore size 112 nm C18 $\mu$ m S6 column, and its temperature was 26 °C with 10 mL/min flow. Its absorbance/detection wavelength was 210 nm. The run time of analysis was 15 min. The results are summarized in Table S1.

**Table S1** Composition and purity analysis by HPLC

| Nitramines<br>(Codes of CACs) | Retention<br>time [min] | Mean area<br>[mAU.s] | Standard<br>Deviation | Percentage<br>of RSD [%] | Content<br>[wt. %] |
|-------------------------------|-------------------------|----------------------|-----------------------|--------------------------|--------------------|
| Pure BCHMX                    | 3.566                   | 501.54               | 3.362                 | 0.669                    | 100.0              |
| Pure CL20                     | 4.674                   | 365.38               | 3.391                 | 0.9229                   | 100.0              |
| Co-crystal 1                  | 3.728                   | 299.06               | 1.867                 | 0.057                    | 52.64              |
|                               | 4.700                   | 275.45               | 1.112                 | 0.035                    | 47.35              |
| Co-crystal 2                  | 3.727                   | 276.75               | 1.073                 | 0.040                    | 50.71              |
|                               | 4.699                   | 262.12               | 1.145                 | 0.037                    | 48.04              |
| S4                            | 3.741                   | 5394.82              | 1.788                 | 0.033                    | 37.80              |
|                               | 4.728                   | 8879.23              | 1.480                 | 0.017                    | 62.20              |
| S5                            | 3.743                   | 1171.95              | 1.254                 | 0.107                    | 27.13              |
|                               | 4.731                   | 3147.49              | 1.156                 | 0.036                    | 72.86              |
| S4LV                          | 3.718                   | 1212.17              | 2.983                 | 0.246                    | 30.47              |
|                               | 4.663                   | 4084.09              | 1.492                 | 0.036                    | 69.53              |
| S4LZ                          | 3.720                   | 1004.06              | 2.133                 | 0.052                    | 30.61              |
|                               | 4.664                   | 2035.88              | 1.688                 | 0.168                    | 69.39              |
| S5LV                          | 3.718                   | 1044.99              | 1.967                 | 0.188                    | 29.85              |
|                               | 4.663                   | 3040.69              | 1.068                 | 0.035                    | 70.15              |

### S3.3 FTIR and Raman spectral studies

A Nicolet Protege 460 FTIR spectrometer was used to record the IR spectral measurements of the samples using the transmission technique. Raman spectra were measured with Nicolet Is50 Raman, Thermo scientific, using an Ar laser ( $\lambda = 514.5$  nm) and a semiconductor laser ( $\lambda = 785$  nm). The maximum output power is 1.7 mW of the light spot of the Raman spectrometer, and the spectral resolution is 1  $\text{cm}^{-1}$ . For a detailed understanding of the structural aspects of the CACs prepared and the interactions between their components, the FTIR and Raman spectroscopic techniques were used. Outputs from FTIR spectroscopy the Fig. S1 and Table 2 represent, from Raman spectroscopy results are summarized in Fig. S2 and Table 3 (both these Tables in the main paper text).

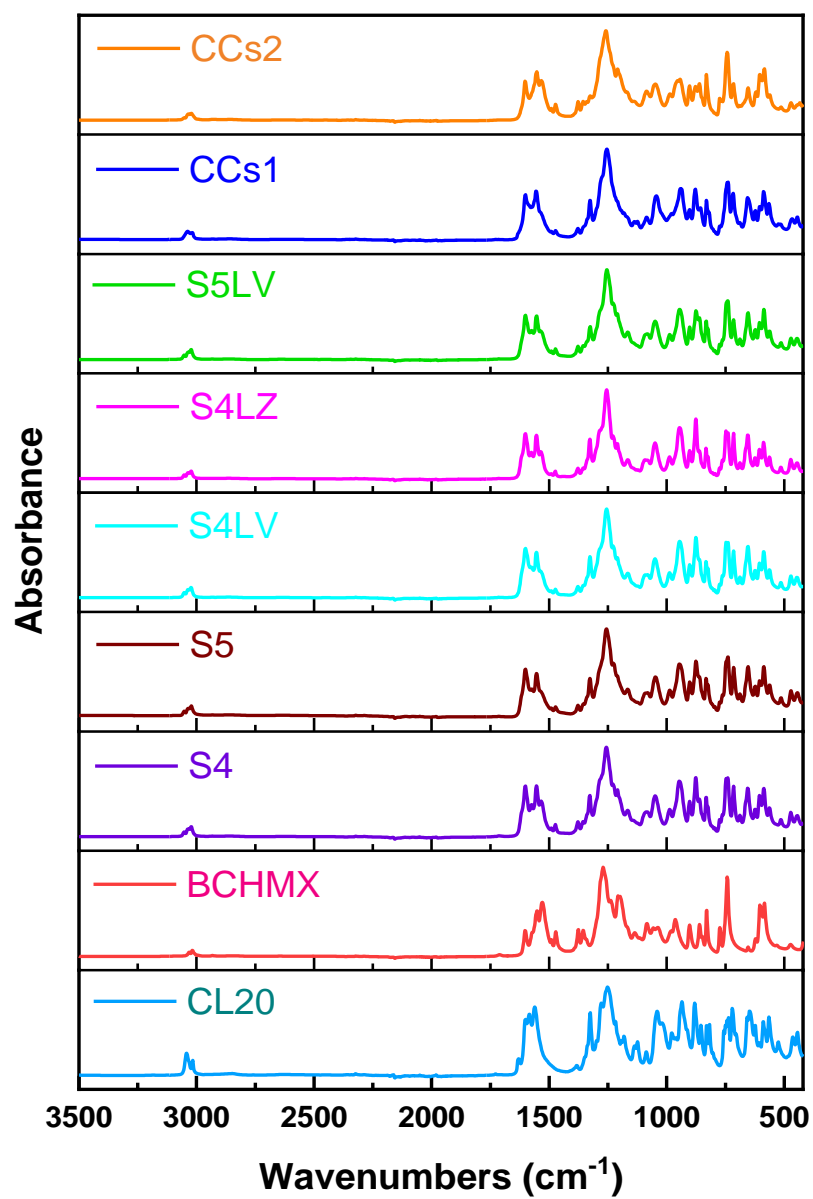

Fig. S1 FTIR spectra of CCs/CACs and their cofomers

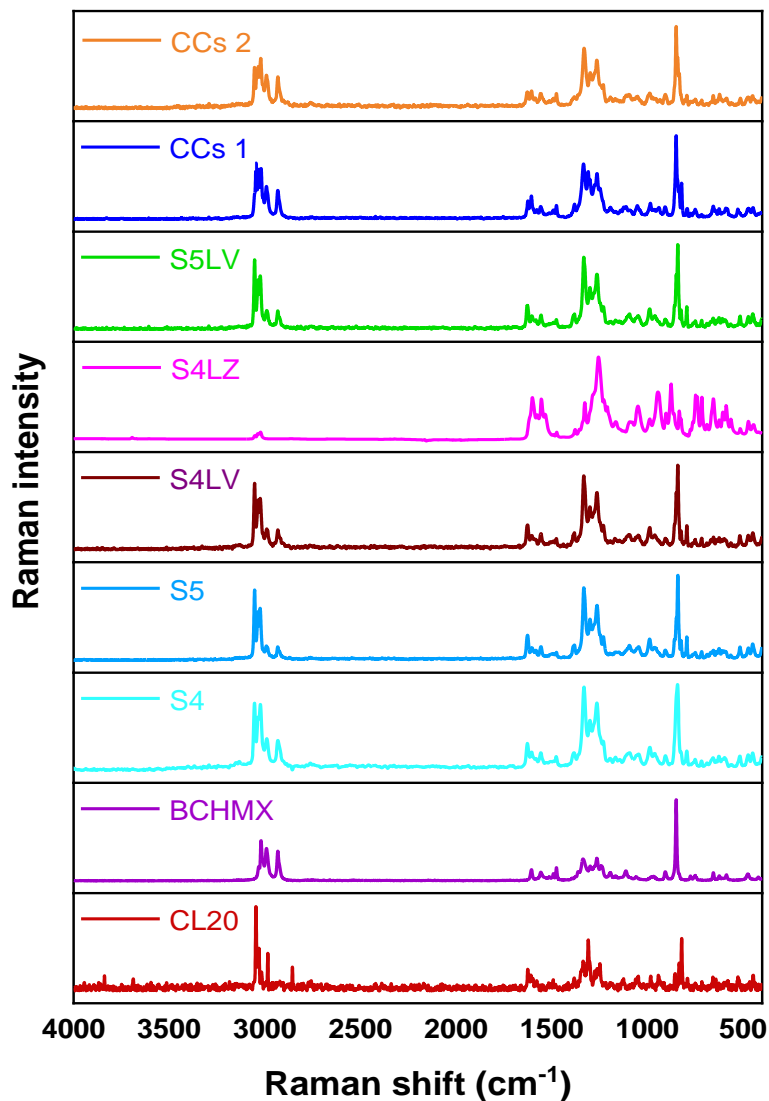

**Fig. S2** Raman spectra of CCs/CACs and their cofomers

### ***S3.4 Powder X-ray diffraction (PXRD)***

To understand the morphology and phase purity by PXRD studies and the Scanning electron microscope (SEM) using a nano-layer gold coating(Tuscan, Czech Republic). The PXRD data were collected at room temperature with a Rigaku MiniFlex 600 powder diffractometer with Bragg-Brentano  $\theta$ - $2\theta$  geometry using  $\text{CuK}\alpha$  radiation ( $\lambda = 1.5418 \text{ \AA}$ ,  $U = 40\text{kV}$ ,  $I = 15 \text{ mA}$ ). Data were scanned with an ultrafast detector Dtex ultra over the angular range  $2$ - $50^\circ$  ( $2\theta$ ) with a step size of  $0.02^\circ$ .

### S3.5 Heat of combustion

The heat of combustion was measured with IKA C 200 Bomb-type calorimeter. The increase of temperature in the calorimeter barrel can be converted into the heat of combustion. The calorimeter was calibrated using benzoic acid. Enthalpy of formation was calculated according to Hess law. To get exact purity of individual and composition of CACs, a chromatographic analysis was carried out in Agilent HPLC 1200 Series with DAD detector. Results are summarized in Table S2.

Hypothetical formulas of CACs were calculated from the HPLC outputs. So, that number of nitrogen atoms in the formula of the given the BCHMX/CL20 CACs/CCs is the same, as there is in the CL-20) molecule (i.e. of 12). Results are summarized in Table S2.

### S3.6 Calculation of detonation parameters

The theoretical detonation parameters (detonation velocity  $D$ , detonation pressure  $P$  and detonation energy  $E_{det}$ ) for the compositions tested as well as pure explosives were calculated using the CHEETAH code [17] with the BKWS set of parameters for the BKW (Becker-Kistiakowsky-Wilson) equation of state, that is,  $\alpha = 0.5$ ,  $\beta = 0.298$ ,  $\kappa = 1050$ ,  $\Theta = 6,620$  [18]. The detonation energy is a sum of mechanical and thermal energies released during the detonation process. The mechanical energy represents the amount of energy available to do mechanical work, and it is equal to the expansion work of detonation products and determined for the volume of detonation products corresponding to a pressure of 1 atm. In contrast, thermal energy is the heat in the detonation products under this pressure [19]. For these calculations, the composition of detonation products was frozen at a temperature of 1800 K on the isentrope beginning at the CJ point. The final thermal energy determined for all compositions and explosives was zero. The calculated detonation parameters for the compositions and for the pure explosives are presented in Table 5 (in the main text of paper).

**Table S2** Hypothetical formulas of the BCHMX/CL20 CACs and their heats of combustion

| Sample code | Molecular formula                                                | Molecular weight | Heat of combustion ( $\text{J}\cdot\text{g}^{-1}$ ) |                |
|-------------|------------------------------------------------------------------|------------------|-----------------------------------------------------|----------------|
|             |                                                                  |                  | determined $Q_c$                                    | averaged $Q_c$ |
| S4          | $\text{C}_{6.00}\text{H}_{7.23}\text{N}_{12.00}\text{O}_{12.00}$ | 439.44           | 8429                                                | 8475±33        |
|             |                                                                  |                  | 8573                                                |                |
|             |                                                                  |                  | 8424                                                |                |
| S4LV        | $\text{C}_{6.00}\text{H}_{6.91}\text{N}_{12.00}\text{O}_{12.00}$ | 439.12           | 8433                                                | 8446±23        |
|             |                                                                  |                  | 8481                                                |                |
|             |                                                                  |                  | 8424                                                |                |
| S4LZ        | $\text{C}_{6.04}\text{H}_{6.89}\text{N}_{12.00}\text{O}_{12.00}$ | 439.58           | 8379                                                | 8379± 3        |
|             |                                                                  |                  | 8375                                                |                |
|             |                                                                  |                  | 8385                                                |                |
| S5          | $\text{C}_{6.00}\text{H}_{6.78}\text{N}_{12.00}\text{O}_{12.00}$ | 438.99           | 8391                                                | 8343±32        |
|             |                                                                  |                  | 8333                                                |                |
|             |                                                                  |                  | 8305                                                |                |
| S5LV        | $\text{C}_{5.99}\text{H}_{6.89}\text{N}_{12.00}\text{O}_{12.00}$ | 438.98           | 8315                                                | 8318± 6        |
|             |                                                                  |                  | 8327                                                |                |
|             |                                                                  |                  | 8312                                                |                |

|       |                                                                           |        |      |         |
|-------|---------------------------------------------------------------------------|--------|------|---------|
| CCs 1 | C <sub>6.03</sub> H <sub>7.21</sub> N <sub>12.00</sub> O <sub>12.00</sub> | 439.78 | 8468 | 8447±13 |
|       |                                                                           |        | 8432 |         |
|       |                                                                           |        | 8442 |         |
| CCs 2 | C <sub>6.00</sub> H <sub>7.46</sub> N <sub>12.00</sub> O <sub>12.00</sub> | 439.70 | 8667 | 8655± 7 |
|       |                                                                           |        | 8651 |         |
|       |                                                                           |        | 8649 |         |

### **S3.7 Impact Sensitivity**

The sensitivity was determined employing a standard impact tester with exchangeable anvil (Julius Peters [20, 21]), with the amount of the tested substance being 40 mm<sup>3</sup> [20]; the detection was based on sound effect [21]; drop hammers of 2 kg weight were used [20, 21]. The new method/algorithm, called FEST [22] (an innovative method of probit analysis [23]), was utilized to determine the probability levels of the initiation. The obtained sensitivity was expressed as the drop energy,  $E_{dr}$ , versus the percentage of initiation. The 50% ( $E_{dr}$  50 %) and 95% ( $E_{dr}$  95 %) probabilities of initiation are specified in this article.

### **S3.8 Differential thermal analysis (DTA)**

This analysis was carried out to understand the CACs samples thermal behaviour was measured using a differential thermal analyzer. A DTA 550 Ex apparatus (OZM Research) was used for thermal analysis of the samples [24]. The measurements were carried out at atmospheric pressure, with the tested sample in direct contact with the air. The tested sample (0.05 g) was placed in a test tube made of Simax glass, 5 mm in diameter and 50 mm long. The reference standard was 0.05 g aluminium oxide. A linear heating rate of 5 °C min<sup>-1</sup> was used.

### **S3.9 Test of the initiation efficiency of coagglomerates in detonators**

The test of the initiation strength of coagglomerates (CACs) of CL20 with BCHMX was carried out according to standard [20] with weights from 51 to 300 mg of selected CACs, in aluminium shells of 7.5 mm diameter, with a pressure of 60 kg per pressing pin, with a secondary charge of 720 mg pentythritol tetranitrate (PETN), pressed by a pressure of 180 kg per pressing pin. The adjusted detonator was then placed on a 5 mm thick lead plate, and the detonator was initiated according to the standard procedure [20]. Figure S3 shows the measurement setup and the result of two tests with an amount of S4LZ from 50 to 300 mg sample weight: in neither of these two tests, the initiation of the secondary charge of the detonator occurred with a charge. In all cases, the aluminium tubes were ruptured, and PETN residues were found; the lead plates were not punctured effectively.

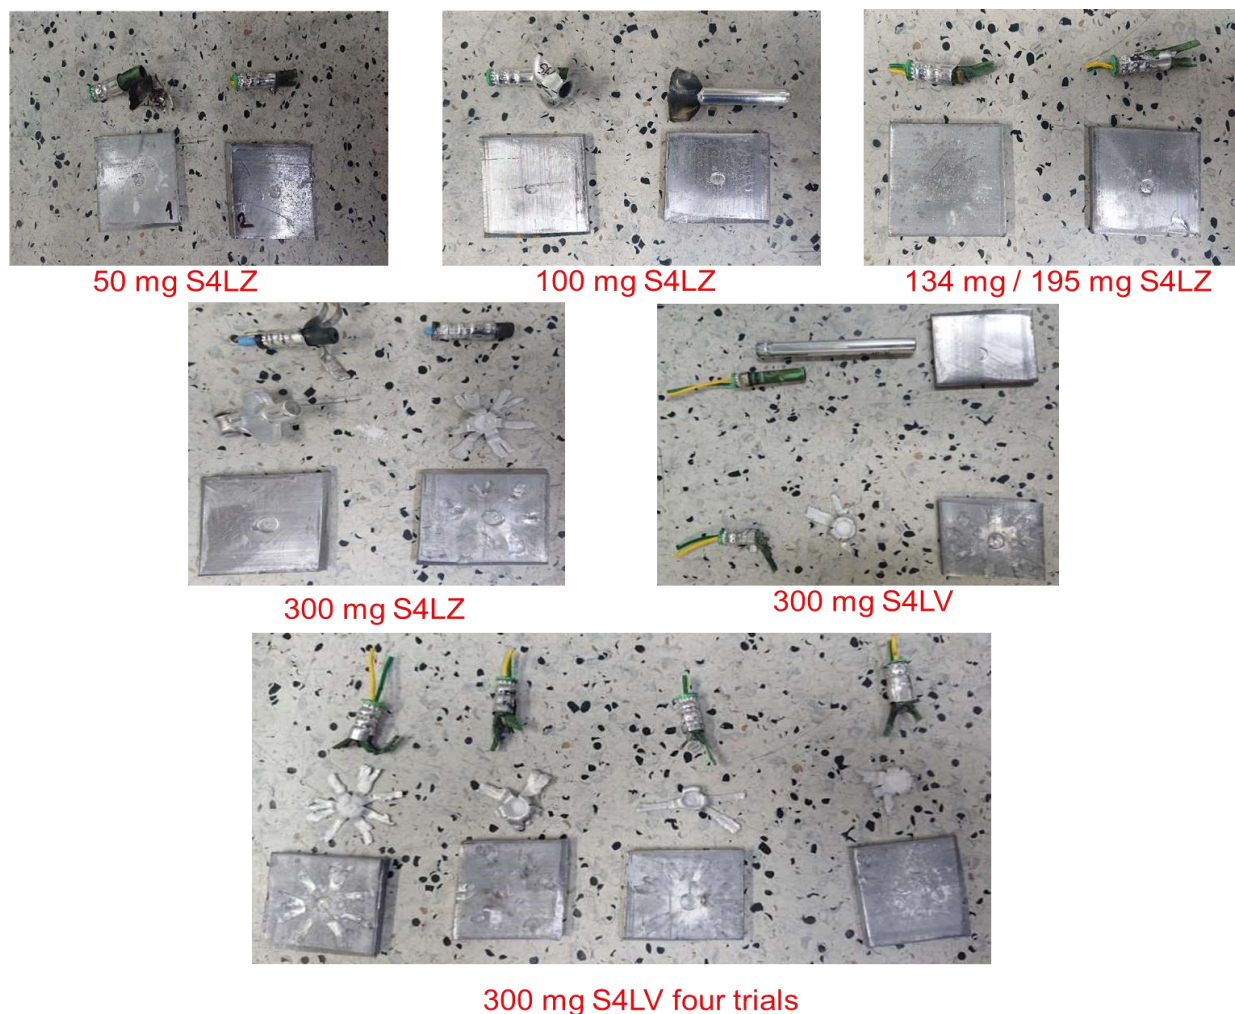

**Fig. S3** The initiation efficiency determination of detonators with CACs as primers results of two tests for each weighed amount - the lead plates pictures.

## References

- 1 A. A. Lobanova, S. V. Sysolyatin, G. V. Sakovich, A. S. Zharkov, O. A. Efimov, N. I. Popov, Process for preparation of 2, 4, 6, 8- tetranitro- 2, 4, 6, 8- tetraazabicyclo[3.3.0] octane by nitration of the corresponding tetrasulfonate salts with nitric acid and nitric anhydride, *Russ. Pat.* RU 2445311 C1, C07D471/00, JCS Federal Res. & Prod. Center ALTAI, Biysk, 2012 (in Russian).
- 2 D. Klasovítý, S. Zeman, Process for preparing cis-1,3,4,6-tetranitrooctahydroimidazo-[4,5-d]imidazole (bicyclo-HMX, BCHMX), *Czech Pat.* 302068, C07D 487/04, 2010 (in Czech).
- 3 A. Elbeih, A. Husarová, S. Zeman, Method of preparation of epsilon-2,4,6,8,10,12-hexanitro-2,4,6,8,10,12-hexaazawurtzitane with reduced impact sensitivity, *U.S. Patent*, US 9,227,981 B2, University of Pardubice, 2016.
- 4 V.B. Patil, K. Zalewski, J. Schuster, P. Belina, W.A. Trzcinski and S. Zeman, A new insight into the energetic co-agglomerate structures of attractive nitramines, *Chem. Eng. J.*, 2021, **420**, 130472,
- 5 Z.-H. Xue, B. Huang, H. Li and Q.-L. Yan, Nitramine-based energetic cocrystals with improved stability and controlled reactivity, *Cryst. Growth Des.*, 2020, **20**, 8124–8147.



- 6 V. M. B. Dabir, S. Viswanath and T. K. Ghosh, Hexanitrohexaazaisowurtzitane (HNIW, CL-20); in: V. M. B. Dabir, S. Viswanath and T. K. Ghosh, editors, *Emerging Energetic Materials: Synthesis, Physicochemical, and Detonation Properties*, Chapter 2, Springer, 2018, pp. 59-100.
- 7 M. Woińska, S. Grabowsky, P. M. Dominiak, K. Woźniak, and D. Jayatilaka, Hydrogen atoms can be located accurately and precisely by X-ray crystallography, *Sci. Adv.*, 2016, **2**(5), e1600192.
- 8 O. Bolton and A. J. Matzger, Improved stability and smart-material functionality realized in an energetic cocrystal, *Angew. Chemie - Int. Ed.*, 2011, **50**(38), 8960–8963.
- 9 N. B. Bolotina, M. J. Hardie, R. L. Speer, and A. A. Pinkerton, Energetic materials: Variable-temperature crystal structures of  $\gamma$ - and  $\epsilon$ -HNIW polymorphs, *J. Appl. Crystallogr.*, 2004, **37**(5) 808–814.
- 10 D. Klasovity, S. Zeman, A. Růžička, M. Jungová, and M. Roháč, cis-1,3,4,6-Tetranitrooctahydroimidazo-[4,5-d]imidazole (BCHMX), its properties and initiation reactivity, *J. Hazard. Mater.*, 2009, **164**(2–3) 954–961.
- 11 V. S. Vuppuluri, Detonation performance analysis of cocrystal and other multicomponent explosives, Dissertation, Faculty of Purdue University, West Lafayette Indiana, May, 2019.
- 12 N. Wang, J. Su, H. Guan, J. Cheng, L. Cheng and J. Li, Simulation on mechanic-thermal-chemical response of CL-20/HMX cocrystal under shock loading, *Chinese J. Energ. Mater.*, 2021, **29**(4) 315–324.
- 13 W. Q. Pang, K. Wang, W. Zhang, L. T. de Luca, X. Z. Fan, and J. Q. Li, CL-20-Based cocrystal energetic materials: Simulation, preparation and performance, *Molecules*, 2020, **25**(18), 4311.
- 14 J. Zhang and J.M. Shreeve, Time for pairing: Cocrystals as advanced energetic materials, *CrystEngComm*, 2016, **18**(33), 6124–6133.
- 15 Z. Can, A. Üzer, Y. Tekdemir, E. Erçağ, L. Türker and R. Apak, Spectrophotometric and chromatographic determination of insensitive energetic materials: HNS and NTO, in the presence of sensitive nitro-explosives, *Talanta*, 2012, **90**, 69–76.
- 16 C.S. Chang, C.H. Wen and T.G. Den, Stationary phases 45. Chromatographic separation of high energetic materials with C60-fullerene stationary phase, *Propellants Explos. Pyrotech.*, 1998, **23**(2), 111–113.
- 17 L. E. Fried, CHEETAH 1.39 Users' Manual UCRL-MA-117541, Livermore, CA: Lawrence Livermore National Laboratory, 1996.
- 18 M. L. Hobbs and M. R. Baer, Calibrating the BKW-EOS with a large products species base and measured C-J properties, in: Proceedings of the 10th Symposium (International) on Detonation, pp.409-418, Boston, 1993.
- 19 W. Fickett and W. C. Davies, Detonation, University of California Press, Berkeley, 1979.
- 20 Public Notice of Czech Mining Authority No. 246/1996 Collection of Czech Laws, Establishing more Detailed Conditions for Allowing Explosives, Explosive Objects and Aids into Use, and Their Testing, Aug. 13<sup>th</sup>, 1996, pp. 3200-3208.
- 21 M. Sućeska, Testing Methods of Explosives, Heidelberg, Springer; 1995.
- 22 J. Šelešovský, V. Pelikan, J. Schuster, B. Janovský and R. Matyáš, FEST – New procedure for evaluation of sensitivity experiments, *Propellants, Explos. Pyrotech.*, 2020, **45**, 1813–1818.
- 23 J. Šelešovský and J. Pachmáň, Probit Analysis – a promising tool for evaluation of explosive's sensitivity, *Cent. Eur. J. Energet. Mater.*, 2010, **7**(3) 269-278.
- 24 M. Krupka, Devices and equipments for testing of energetic materials, New Trends in Research of Energetic Materials, Proceedings of the 4th Seminar, Univ. Pardubice, 2001, p. 222.
